# Supplementary material
Source: Frontiers journal article supplement (https://www.frontiersin.org/articles/424472)
Supplement: Data_Sheet_1.PDF [file Data_Sheet_1.PDF]

## **Supplemental videos**

1. Supplmov\_01.mp4

'COPRAmove' velocity analysis of intracellular organelle trafficking in a chicken telencephalon glia cell.

2. Supplmov\_02.mp4

Pseudo-DIC 48-hour time laps video of neuronal network in hippocampal neuron-glia culture.

3. Supplmov\_03.mp4

Dual motility analysis of a growing neuronal cellular network and microglia in a highly magnified cell hippocampal neuron-glia culture.

4. Supplmov\_04.mp4

48-hour time laps video of colored overlay of segmented soma and neurite network in hippocampal cells.

5. Supplmov\_05.mp4

'MoveDiff' membrane ruffling measurement of a contracting and expanding pericyte, recorded in a 9-hour time laps video.
